# Supplementary material for: Trends in characteristics of neurologists who provide stroke consultations in the USA, 2008–2021
Source: HighWire-hosted journal article supplement (doi:10.1136/svn-2022-001662), 2022-07-28
Supplement: svn-2022-001662supp001_data_supplement.pdf [file svn-2022-001662supp001_data_supplement.pdf]

## **Trends in characteristics of neurologists who provide stroke consultations in the United**

**States, 2008 to 2021**

### **Supplemental Material**

### **Supplemental Methods**

#### **Codes used to identify TIA/AIS episodes**

*Diagnosis codes: ICD-9 codes (433.X (except for 433.10), 434.X, 435.X, 436.25), and ICD-10 codes (I63-I66 (except I65.2), I67.89, G45.X).*

#### **Defining an episode**

An episode included inpatient or outpatient ED/observation stays in any short-term acute care or critical access hospital with a primary diagnosis for acute ischemic stroke (see “Codes used to identify TIA/AIS episodes and neurology consultations”). For patients with multiple, contiguous claims for stroke at the same hospital or across different hospitals, we consolidated their claim records into a single episode. For example, if a patient with stroke was cared for in the ED of one hospital, then transferred and admitted to another hospital, those different claims were combined into a single admission episode that was classified based on the first hospital where they received care.

#### **Statistics**

Error bars are given by standard errors calculating using SAS.
